# Supplementary material
Source: Springer Nature journal article supplement (https://www.springermedizin.de/resource/supplementary/13256_2008_472_MOESM2_ESM.pdf/9646056)

Tilt: 0

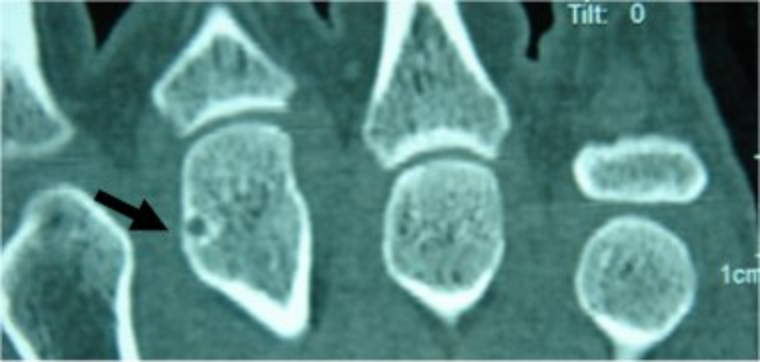

1cm

Supplement: MOESM2 [file 9646056]
